# 1    **A method for allocating low-coverage sequencing** 2    **resources by targeting haplotypes rather than** 3    **individuals**

4

5    Roger Ros-Freixedes, Serap Gonen, Gregor Gorjanc, John M Hickey<sup>§</sup>

6

7    The Roslin Institute and Royal (Dick) School of Veterinary Studies, The University of

8    Edinburgh, Easter Bush, Midlothian, Scotland, UK

9

10    <sup>§</sup>Corresponding author

11

12    Email addresses:

13    RRF: roger.ros@roslin.ed.ac.uk

14    SG: serap.gonen@roslin.ed.ac.uk

15    GG: gregor.gorjanc@roslin.ed.ac.uk

16    JMH: john.hickey@roslin.ed.ac.uk

17

# Abstract

## Background

18           This paper describes a heuristic method for allocating low-coverage  
19 sequencing resources by targeting haplotypes rather than individuals. Low-coverage  
20 sequencing assembles high-coverage sequence information for every individual by  
21 accumulating data from the genome segments that they share with many other  
22 individuals into consensus haplotypes. Deriving the consensus haplotypes accurately  
23 is critical for achieving a high phasing and imputation accuracy. In order to enable  
24 accurate phasing and imputation of sequence information for the whole population we  
25 allocate the available sequencing resources among individuals with existing phased  
26 genomic data by targeting the sequencing coverage of their haplotypes.

## Results

27           Our method, called AlphaSeqOpt, prioritizes haplotypes using a score function  
28 that is based on the frequency of the haplotypes in the sequencing set relative to the  
29 target coverage. AlphaSeqOpt has two steps: (1) selection of an initial set of  
30 individuals by iteratively choosing the individuals that have the maximum score  
31 conditional to the current set, and (2) refinement of the set through several rounds of  
32 exchanges of individuals. AlphaSeqOpt is very effective for distributing a fixed  
33 amount of sequencing resources evenly across haplotypes, which results in a  
34 reduction of the proportion of haplotypes that are sequenced below the target  
35 coverage. AlphaSeqOpt can provide a greater proportion of haplotypes sequenced at  
36 the target coverage by sequencing less individuals, as compared with other methods  
37 that use a score function based on the haplotypes population frequency. A refinement  
38 of the initially selected set can provide a larger more diverse set with more unique  
39 individuals, which is beneficial in the context of low-coverage sequencing. We extend

40 the method with an approach to filter rare haplotypes based on their flanking  
41 haplotypes, so that only those that are likely to derive from a recombination event are  
42 targeted.

## Conclusions

43 We present a method for allocating sequencing resources so that a greater  
44 proportion of haplotypes are sequenced at a coverage that is sufficiently high for  
45 population-based imputation with low-coverage sequencing. The haplotype score  
46 function, the refinement step, and the new approach of filtering rare haplotypes make  
47 AlphaSeqOpt more effective for that purpose than methods reported previously for  
48 reducing sequencing redundancy.

## Introduction

49           This paper describes a heuristic method for allocating low-coverage  
50 sequencing resources by targeting haplotypes rather than individuals so that  
51 haplotypes have a coverage that is sufficiently high for population-based imputation.

52           The use of whole-genome sequencing data has great potential in livestock  
53 breeding programs. It may increase the power of discovery of causative variants [1–3]  
54 and may enable more accurate and persistent predictions of breeding values than  
55 marker array genotypes [4,5]. To capture the full potential of sequence data in  
56 livestock, sequence and phenotype data on a large number, perhaps millions, of  
57 individuals may be required to accurately estimate the effects of the large number of  
58 causative variants that underlie quantitative traits [6].

59           Low-cost sequencing strategies combined with imputation can be utilised to  
60 generate the required amount of sequence information for a large number of  
61 individuals at an affordable cost [7–11]. The strategies for low-cost sequencing can be  
62 classified into three groups: (1) to sequence a certain number of key individuals at  
63 high coverage, as in the 1,000 Bull Genomes project (**KeySires**) [2,5]; (2) to sequence  
64 a larger number of individuals at low coverage (**LCSeq**) [6,12,13]; and (3) to  
65 sequence a set of chosen individuals at a wide range of coverages (**VarCoverage**)  
66 [14].

67           The LCSeq approach exploits the fact that the population structures that are  
68 typical in livestock breeding result in individuals being sufficiently related to share  
69 large genome segments. LCSeq focuses sequencing on the haplotypes in the  
70 population rather than on any individual. LCSeq sequences individuals at low  
71 coverage and assembles high-coverage sequence information for every haplotype by  
72 accumulating the low-coverage sequence data from the genome segments that are

73 shared between many individuals to derive the ‘consensus haplotypes’. The consensus  
74 haplotypes are then used to impute the sequence data of the individuals. Deriving the  
75 consensus haplotypes accurately is critical for achieving a high phasing and  
76 imputation accuracy under the LCSeq strategy.

77 With the LCSeq approach potentially many more individuals can be sequenced  
78 than with the KeySires or VarCoverage approaches. This provides three advantages to  
79 the LCSeq approach: (1) higher variant discovery rates, particularly for low-frequency  
80 variants [15]; (2) inclusion of rare haplotypes; and (3) a more precise capture of the  
81 recombination events that have occurred in the population, which would enable better  
82 definition of the haplotypes that are present in the population and thus better  
83 imputation of these haplotypes into the individuals that carry them.

84 There are methods to optimise the selection of individuals for sequencing for  
85 the three alternate sequencing approaches. Most of these methods focus only on the  
86 choice of which individuals to sequence with the aim to impute their sequence  
87 information into their relatives [5,16–18]. Recently, Gonen et al. [14] proposed a  
88 method that identifies the individuals with the largest genetic footprint on the  
89 population and optimises the allocation of sequence resources across these focal  
90 individuals and their ancestors with the aim to maximise phasing accuracy of their  
91 sequenced haplotypes when using family-based phasing methods.

92 Although LCSeq could be used alone, we envisage a sequencing strategy in  
93 two stages for facilitating the imputation of sequence data. The first stage uses the  
94 method developed by Gonen et al. [14] with the aim of producing a set of accurately  
95 phased haplotypes that are shared by a lot of individuals in the population. The second  
96 stage seeks to complement the first stage by applying the LCSeq approach as  
97 described above to spread low-coverage sequence data across the population so that

98 whole-genome sequence data can be imputed to the whole population, which in turn  
99 will be enhanced by the phasing of the most common haplotypes achieved in the first  
100 stage. To do this effectively a method for optimising the allocation of sequencing  
101 resources under the LCSeq approach should be developed.

102 We hypothesise that such a method should maximise the sequencing coverage  
103 of the maximum possible number of haplotypes because this would enable  
104 population-based phasing and imputation methods rather than family-based  
105 imputation methods to accurately phase and impute the data to all individuals. For  
106 such population-based phasing and imputation methods, a certain level of sequence  
107 coverage must be accumulated for accurate inference of a consensus haplotype. With  
108 a prototype of such a population-based phasing and imputation method we observed  
109 that there is a positive relationship between the coverage that a particular haplotype  
110 accumulates across individuals and the imputation accuracy of a consensus haplotype  
111 (for a description, see Additional file 1: Figure S1). A random allocation of  
112 sequencing resources under the LCSeq approach results in some haplotypes being  
113 sequenced many times, some rarely, and some not at all. To optimise the allocation of  
114 sequencing resources under LCSeq we need to maximise the proportion of haplotypes  
115 that are sequenced at the target coverage and minimise the proportion of haplotypes  
116 that are under- or over-sequenced. Similarly, we need to minimise the sequencing  
117 resources allocated to haplotypes that are too rare to have consensus haplotypes  
118 inferred or their effects estimated accurately.

119 The objective of this work was to develop a method that uses haplotypes  
120 derived from existing phased marker array genotypes to identify which individuals  
121 should be sequenced, and at what coverage, to maximize the proportion of consensus  
122 haplotypes sequenced at a minimum target coverage. Our method uses a score

123 function to identify a set of individuals based on the coverage at which their  
124 haplotypes are sequenced and then it refines the initial set of individuals through  
125 rounds of exchanges. We extend the method with an approach to filter out rare  
126 haplotypes so that we only target those that are likely to derive from the  
127 recombination of common haplotypes. We tested the performance of the algorithm  
128 using simulated data and the results showed that our method is efficient in distributing  
129 the sequencing resources evenly across a large proportion of the haplotypes observed  
130 in the population.

131

## Materials and Methods

132

### Description of the AlphaSeqOpt method

133 Our method utilises existing phased marker array genotypes to identify which  
134 individuals should be sequenced, and at what coverage, so that the maximum  
135 proportion of haplotypes are sequenced at any minimum target coverage with a fixed  
136 sequencing budget. The method has two main steps. In the first step, referred as  
137 ‘initial set selection’, an initial set of individuals is selected by iteratively choosing the  
138 individuals that are the most complementary to the ones already in the set according  
139 to a score function. In the second step, referred as ‘set refinement’, the initial set of  
140 individuals is refined through several rounds of exchanges. The method was  
141 implemented in a software package called AlphaSeqOpt, which also implements the  
142 method of Gonen et al [14]. Throughout the rest of the paper, AlphaSeqOpt is used  
143 when referring to our method.

144

145 **Initialisation step:**

146           0a: Construct a haplotype library for the population using existing phased  
147 marker array genotypes. Split each chromosome into  $c$  cores of length  $m$  markers. A  
148 ‘core’ is each of the strings of  $m$  consecutive marker positions used to determine the  
149 haplotypes. Within a core, strings of alleles (previously phased) are compared to  
150 define which haplotype each individual carries in each parental chromosome. Strings  
151 of alleles that are identical between two individuals are defined as a unique haplotype  
152 and strings with multiple mismatches are defined as different haplotypes. A  
153 predefined number of mismatches can be allowed before two strings of alleles are  
154 defined as different haplotypes to account for sequencing errors.

155           0b: Calculate the maximum size of the sequencing set. Assuming linear  
156 sequencing costs, the sequencing budget divided by the cost of 1x sequencing  
157 determines the total amount of sequencing coverage that could be produced,  
158 represented by the number of slots of the sequencing set. A ‘slot’ is each of the  
159 positions in the set, which can be assigned to any given individual following the steps  
160 below. Each slot corresponds to 1x sequencing.

161

# 162           **Initial set selection (step 1):**

163           1a: Calculate a score for each haplotype in each core. We derived a score  
164 function that prioritizes the haplotypes that are closer to reaching the target coverage.  
165 The score function is based on the frequency of a haplotype in the sequencing set  
166 relative to the target coverage. The score function is:

$$167 \quad \text{Score} = \begin{cases} \exp\left(\left(\frac{\text{HapCount}}{2 \cdot \text{TargetCov} - 1}\right)^2\right), & \text{if HapCount} < 2 \cdot \text{TargetCov} \\ 0, & \text{if HapCount} \geq 2 \cdot \text{TargetCov} \end{cases}$$

168 where HapCount is the number of times that a haplotype appears in the current  
169 sequencing set and TargetCov is the target haplotype coverage (Figure 1). The score



170 increases every time that an individual that carries a given haplotype is added to the  
171 sequencing set. When the haplotype count in the set reaches twice the target coverage,  
172 which is the haplotype count required to produce the target coverage assuming that  
173 for each  $x$  of coverage of an individual there is a probability of 0.5 of reading either  
174 the paternal or maternal haplotype, the score is set to 0 to prevent over-sequencing of  
175 well-covered haplotypes in favour of allocating sequencing resources to other  
176 haplotypes.

177       1b: Calculate the total score for every individual as the sum of the scores of  
178 the haplotypes that each individual carries at each core.

179       1c: Add the individual with the maximum score to the first available slot of the  
180 initial set. If there is more than one individual satisfying this condition, one individual  
181 is selected at random amongst those individuals with the maximum score. Repetition  
182 of individuals in several slots of the set is allowed. The number of slots occupied by  
183 the same individual indicates at what coverage it should be sequenced (i.e., an  
184 individual that appears  $n$  times in the set should be sequenced at  $nx$ ).

185       1d: Calculate the total cost of sequencing the current set as the cost of library  
186 preparation times the number of individuals in the set plus the cost of  $1x$  sequencing  
187 times the total sequencing coverage produced.

188       1e: Repeat steps 1a to 1d until the initial set is complete (i.e., we have a set of  
189 individuals at variable coverage that exhausts all the sequencing resources). Because  
190 some resources are used for library preparation some slots will be left empty.

191

## 192       **Set refinement (step 2):**

193       2a: Choose randomly a predetermined number of slots of the set. Remove the  
194 individuals assigned to these slots from the set.

195           2b: Repeat steps 1a to 1d to fill the emptied slots. Individuals removed in step  
196   2a can go back into the set if they have the maximum individual score.

197           2c: If the exchanges result in the same or a greater percentage of unique  
198   haplotypes sequenced at (or above) the target coverage, keep the new set. Otherwise,  
199   discard the new set in favour of the previous set.

200           2d: Repeat steps 2a to 2c for a predefined number of exchange rounds.

201

202           If there are individuals that have been sequenced previously, AlphaSeqOpt can  
203   account for the available sequence data easily by adding the pre-existing coverage of  
204   their haplotypes to HapCount during the calculation of the haplotype scores in step 1a.  
205   If there are not any individuals that have been sequenced previously, all haplotypes  
206   will have the same starting score and the first individual will be selected at random  
207   amongst those that have more non-missing haplotypes.

208           For any given target haplotype coverage, AlphaSeqOpt will produce a set of  
209   individuals to be sequenced from 1x to a maximum coverage equal to twice the target  
210   coverage. To ensure that all individuals are sequenced at a low coverage and that a  
211   larger number of individuals is sequenced it is also possible to restrict the coverage  
212   for the individuals in the set to a desired maximum (e.g., to 1x or 2x).

213           In the implementation of AlphaSeqOpt we are making two assumptions  
214   regarding the yield of data from the sequencer: (1) that sequencing coverage is  
215   uniform across the genome; and (2) that for each x of coverage of an individual there  
216   is a probability of 0.5 of reading either the paternal or maternal haplotype and  
217   therefore each haplotype receives half the coverage. Even though these assumptions  
218   contradict empirical observations [19], there is no straightforward way of accounting  
219   for variation of coverage across genome or between alleles prior to performing

220 sequencing. Regarding the sequencing costs, we are assuming that when we increase  
221 the sequencing coverage we incur a linear increase of the sequencing costs.  
222 AlphaSeqOpt can also account for non-linear cost structures by modifying the cost  
223 equation used in step 1d.  
224

## Algorithm testing

225 The proposed method was tested against our implementation of the Inverse  
226 Weight Selection (IWS) method as described by Bickhart et al. [17], our adaptation of  
227 the IWS method to obtain more comparable results, and a method that selects the  
228 individuals randomly (referred to as Random).

229 The IWS method as described by Bickhart et al. [17] follows the step 1 as  
230 described above but in step 1a it uses an inverted parabolic score function  $f_i^2 - 2f_i + 1$ ,  
231 where  $f_i$  is the population frequency of the haplotype. Note that this function uses the  
232 population frequency, while the score function that we propose uses the frequency of  
233 the haplotype in the sequencing set relative to the target coverage. The two score  
234 functions are compared in Figure 1. Another major difference with AlphaSeqOpt is  
235 that Bickhart et al. [17] proposed targeting only homozygous haplotype cores based  
236 on the marker array genotypes. Thus, the IWS method only scores such haplotypes  
237 and it stops after the initial set is constructed, without a step of refinement.

238 Our adaptation of IWS mirrored the method that we propose more closely,  
239 including a step of refinement of the initially selected set, with the only difference  
240 being the score function used. This method follows both steps 1 and 2 as described  
241 above but in step 1a it uses the inverted parabolic function  $f_i^2 - 2f_i + 1$ . We did not  
242 follow the suggestion of targeting only the haplotypes at cores that are predicted to be

243 homozygous based on the marker array genotypes, because this would disadvantage  
244 the adapted IWS method.

245 The Random method also used the algorithm described but individuals were  
246 selected randomly instead of according to a score function. In the refinement step,  
247 random exchanges of individuals were performed.

248 All methods were tested in a range of scenarios. The scenarios varied in the  
249 target haplotype coverage (5x, 10x, or 15x) and in the total available sequencing  
250 resources (£400,000, £800,000, or £1,600,000 GBP). We calculated the cost of each  
251 scenario assuming a cost in library preparation of £40 and a cost in 1x sequencing of  
252 £80. The tested sequencing resources would produce a total of 5,000x, 10,000x, or  
253 20,000x whole-genome reads, respectively, if cost of library preparation was ignored.  
254 Haplotypes observed only once or twice in the population were excluded from the  
255 analyses unless stated otherwise. Additional tests were performed with a restriction of  
256 maximum individual coverage of 1x, for different numbers of exchanges per round,  
257 ranging from 1 slot to the total size of the set, and for different costs of library  
258 preparation, ranging from no cost to £40. We performed 10 repetitions for all  
259 analyses. The percentage of unique haplotypes sequenced at (or above) the target  
260 coverage was used as the main criterion, together with the number of individuals  
261 sequenced.

262 For simplicity, in some instances we will focus on the scenarios with a target  
263 haplotype coverage of 10x but the algorithm can be used with any desired target  
264 coverage.

265

## Filtering of rare haplotypes based on flanking context

266           A new approach for filtering the rare haplotypes included in the analyses was  
267 also developed. In this approach we filtered the rare haplotypes so that only those rare  
268 haplotypes that are likely to derive from a recombination event between two common  
269 haplotypes were targeted.

270           The filtering was based on two assumptions: (1) rare haplotypes that were  
271 derived from a recombination event between common haplotypes will be flanked by  
272 common haplotypes; and (2) there will be no other individuals that carry the same  
273 combination of haplotypes at the cores that flank the rare recombined haplotype. The  
274 second assumption could be false if, for example, there had been multiple  
275 recombination events at different positions of the same core that produced multiple  
276 rare recombinant haplotypes from the same two common haplotypes, but note that  
277 this is a method for directing the sequencing resources among rare haplotypes, not an  
278 exact method for capturing all recombination events. Note also that combinations of  
279 consecutive cores with rare haplotypes could indicate either genomes that are  
280 unrelated to the population or phasing errors.

281           We implemented the above filtering approach according to the population  
282 count of the haplotypes at each core. In any given core, haplotypes with population  
283 count below a predefined threshold are included in the analysis only if all of the  
284 following conditions are met: (1) the rare haplotype is not at the first or last core of a  
285 chromosome; (2) the counts of the flanking haplotypes are greater than a predefined  
286 threshold (FlankCount); and (3) there are less than a predefined number (nComb) of  
287 individuals carrying the same combination of haplotypes flanking the rare haplotype.

288           In our implementation of AlphaSeqOpt we used this filtering approach on  
289 those rare haplotypes with population count  $\leq 2$  (observed only once in the population,

referred to as ‘singletons’, or twice, referred to as ‘doubletons’) using FlankCount=2 and nComb=3. The same method could be applied for any population count. This approach for filtering the rare haplotypes was tested against the reference case with no filtering and against the approach in which all singletons and doubletons were filtered out.

# **Simulated dataset**

To demonstrate the implementation of the algorithm, a testing dataset was simulated to mimic a typical livestock population with known structured pedigree.

Sequence data was generated for 1,000 base haplotypes for each of ten chromosomes using the Markovian Coalescent Simulator [20] and AlphaSim [21,22]. Chromosomes were simulated to be 100 cM and  $10^8$  base pairs in length, with a per site mutation rate of  $2.5 \times 10^{-8}$  and a per site recombination rate of  $1.0 \times 10^{-8}$ . The effective population size ( $N_e$ ) was set to specific values during the simulation based on previously estimated  $N_e$  values within the Holstein cattle population [23]. These set values were: 100 in the base generation, 1,256 at 1,000 years ago, 4,350 at 10,000 years ago, and 43,500 at 100,000 years ago, with linear changes in between. The resulting sequence had approximately 650,000 segregating SNP loci across the ten chromosomes.

To enable the selection of sires for the generation of a pedigree, a quantitative trait influenced by 10,000 QTN distributed equally across the ten chromosomes was simulated. QTN positions were randomly chosen from the 650,000 segregating sequence loci and their effect sizes sampled from a normal distribution with a mean of zero and standard deviation of 0.01 (1.0 divided by the square root of the number of

313 QTN). The QTN effects were used to compute the true breeding value (TBV) for each  
314 individual.

315 To emulate livestock breeding populations, a pedigree of 15 generations was  
316 simulated. Each generation comprised 1,000 individuals in equal sex ratio (i.e., 500  
317 males and 500 females). In the first generation, chromosomes for each individual  
318 were sampled from the 1,000 sequence haplotypes in the base generation. In  
319 subsequent generations, chromosomes of each individual were sampled from parental  
320 chromosomes, assuming recombination with no interference. In each generation, the  
321 25 males with the highest TBVs were selected as sires of the next generation. No  
322 selection was performed on females, and all 500 females were used as parents.

323 All individuals were assumed to be genotyped with a panel of 10,000 SNP  
324 markers distributed equally across the ten chromosomes. Marker genotypes of all  
325 individuals were phased using AlphaPhase [24–26] as input for AlphaSeqOpt. The  
326 parameters used for determining the population haplotype libraries were: (1)  
327 population haplotype libraries were created using individuals and SNPs with at least  
328 90% phased genotype data; (2) sharing of haplotypes was determined as 100%  
329 identity matches; and (3) core lengths were set to 100 SNPs per chromosome.

330 In summary, the algorithm was tested using a dataset with 15,000 individuals.  
331 Individuals had 10 chromosomes and 10 cores per chromosome. The total number of  
332 haplotypes in the population was 8850 (on average, 88.5 haplotypes per core). Further  
333 details on the simulated dataset can be found in Gonen et al. [14].

334

# **Software availability**

335 The method has been implemented in the AlphaSeqOpt software package.  
336 AlphaSeqOpt is available for download at

337 <http://www.alphagenes.roslin.ed.ac.uk/alphaseqopt/>, along with a detailed user  
338 manual.  
339

## Results

340

### Performance of algorithm

341 AlphaSeqOpt allocated sequencing resources to enable a greater percentage of  
342 haplotypes in the population to be sequenced at the target coverage than other  
343 methods previously reported.

344 Figure 2 shows the comparison of AlphaSeqOpt with IWS, the adapted IWS,  
345 and Random when the target haplotype coverage was 10x. We tested different  
346 scenarios in which the total available sequencing resources were £400,000, £800,000,  
347 or £1,600,000. Figure 2a shows the percentage of haplotypes that would be sequenced  
348 at (or above) the target coverage of 10x by sequencing the set of individuals selected  
349 with AlphaSeqOpt. Figure 2b shows the number of individuals selected for  
350 sequencing in each of the scenarios. AlphaSeqOpt delivered the highest percentage of  
351 haplotypes sequenced at the target coverage, followed by the adapted IWS method,  
352 which achieved a lower percentage even though it sequenced a number of individuals  
353 similar to AlphaSeqOpt. The IWS method resulted in only a very small set of  
354 individuals being sequenced and these individuals captured only a small percentage of  
355 haplotypes sequenced at the target coverage. This result occurred because, as done by  
356 Bickhart et al. [17], we only targeted haplotypes that appeared in a homozygous state  
357 in at least one animal, which represent a small proportion of the haplotypes observed  
358 in the population, and therefore the IWS method did not exhaust all the available  
359 sequencing resources in any of the cases tested. The Random method sequenced a



360 very large set of individuals but it was inefficient for obtaining the haplotypes  
361 sequenced at the target coverage.

362 The AlphaSeqOpt method was further tested to assess the effect of its main  
363 features on the percentage of haplotypes sequenced at (or above) the target coverage,  
364 the number of individuals sequenced, the performance under restriction of the  
365 maximum coverage per individual, and the performance of the refinement step with  
366 different number of exchanges per round.

367

### 368 **Percentage of haplotypes sequenced at the target coverage:**

369 The advantage provided by the AlphaSeqOpt score function and the step of  
370 refinement over the adapted IWS method is shown in Figure 3. Figure 3a shows the  
371 percentage of the haplotypes that would be sequenced at (or above) the target  
372 coverage by sequencing the set of individuals selected with AlphaSeqOpt. We tested  
373 nine scenarios in which the target coverage was 5x, 10x, or 15x and the total available  
374 sequencing resources were £400,000, £800,000, or £1,600,000. Each scenario was  
375 tested with either the AlphaSeqOpt score function or the IWS score function (adapted  
376 IWS method), and both the initial and refined sets were examined.

377 The AlphaSeqOpt score function provided a greater percentage of haplotypes  
378 sequenced at the target coverage than the IWS score function in all scenarios. The  
379 AlphaSeqOpt score function gave 1.8 to 6.6% more haplotypes sequenced at the  
380 target coverage than the IWS score function. The advantage of the AlphaSeqOpt score  
381 function was observed both in the initial and refined sets. The refinement step  
382 increased the percentage of haplotypes sequenced at the target coverage by 1.0 to  
383 3.1% with the AlphaSeqOpt score function and 1.4% to 4.7% with the IWS score  
384 function. In total, using the AlphaSeqOpt score function and a refinement step

385 delivered 6.6 to 9.3% more haplotypes sequenced at the target coverage than using the  
386 IWS score function without a refinement step.

387 AlphaSeqOpt performed better because it was more efficient at allocating the  
388 sequencing resources so that there were very few haplotypes that received some, but  
389 insufficient, sequencing coverage.

390 Figure 4a shows the distribution of the population count of the haplotypes and  
391 Figure 4b the distribution of the sequencing coverage that the haplotypes receive by  
392 sequencing the set of individuals selected with each method. Note that the x-axis in  
393 Figure 4b is half that of Figure 4a because for each x of coverage of an individual  
394 there is a probability of 0.5 of reading either the paternal or maternal haplotype in the  
395 diploid species that was simulated. Because the results for all scenarios were similar,  
396 for illustration purposes from here onwards we only show results for the scenario in  
397 which the target coverage was 10x and the sequencing resources were £800,000. Also  
398 note that the haplotypes with population count  $\leq 2$  are shown in Figure 4a but were  
399 excluded from the analyses shown in Figure 4b.

400 As a reference, choosing individuals randomly followed by random exchanges  
401 of individuals followed the distribution of the population frequencies, with a large  
402 percentage of haplotypes sequenced at coverages below the target 10x (54.0% of the  
403 haplotypes had sequence coverage between 0.5x and 9.5x). The AlphaSeqOpt score  
404 function reduced this percentage to only 6.3% in the initial set and 5.6% in the refined  
405 set. This percentage was greater with the adapted IWS method than with  
406 AlphaSeqOpt in both sets (17.3% in the initial set was reduced to 14.7% in the refined  
407 set). The percentage of haplotypes that received no coverage at all in the refined set  
408 were 19.2% for AlphaSeqOpt, 14.9% for the adapted IWS, and 6.3% for Random.

409

410           **Number of individuals sequenced:**

411           The initial sets that were selected by AlphaSeqOpt produced greater  
412 percentages of haplotypes at the target coverage by sequencing less animals than the  
413 sets selected by the adapter IWS method. The refinement step with the AlphaSeqOpt  
414 score function produced sequencing sets that contained a larger number of unique  
415 individuals than with the IWS score function. The extent to which the size of the  
416 sequencing set was increased depended on the cost of library preparation and the  
417 amount of sequencing resources available.

418           Figure 3b shows the number of individuals in the sets selected in each of the  
419 scenarios explored in Figure 3a. The initial set was smaller with the AlphaSeqOpt  
420 score function than with the IWS score function by between 122 and 340 individuals.  
421 During the refinement step with the AlphaSeqOpt score function, the set maintained  
422 approximately the same size when a small amount of sequencing resources was  
423 available but increased by up to 457 individuals when more sequencing resources  
424 were available. In contrast, during the refinement with the IWS score function, the  
425 size of the sequencing set decreased when few sequencing resources were available  
426 but remained more stable with a large amount of sequencing resources.

427           Figure 5 shows the effect of the cost of library preparation on the percentage  
428 of haplotypes sequenced at (or above) the target coverage (Figure 5a) and the number  
429 of unique individuals (Figure 5b) in the refined set produced with the AlphaSeqOpt  
430 score function or the IWS score function. With both score functions, the percentage of  
431 haplotypes sequenced at the target coverage increases linearly with decreasing library  
432 costs. When library cost is low, the AlphaSeqOpt score function produces larger sets  
433 with more unique individuals than the IWS score function, and these larger sets  
434 produce greater percentages of haplotypes sequenced at the target coverage. When the

library costs are high, the difference between the sizes of the sets obtained with the two score functions is reduced. Figure 5c shows the distribution of the sequencing coverage across sequenced individuals in the refined set produced with the AlphaSeqOpt score function considering two extreme library costs. Low library costs allowed for the sequencing of more individuals at low coverage while high library costs resulted in a greater number of individuals being sequenced at twice the target coverage of the haplotypes. With a library cost of £5 the number of individuals sequenced was 1307.6 (302.2 at 1x to 124.3 at 20x) and with a library cost of £40 it decreased to 1036.4 (136.6 at 1x to 176.7 at 20x).

444

#### 445 **Restriction of individual coverage:**

446 The size of the sequencing set can be maximised by restricting the maximum  
447 coverage that each individual can get, so that the target coverage of the haplotypes is  
448 achieved by accumulating individuals sequenced only at or below a certain coverage.  
449 Figure 6 shows the comparison of AlphaSeqOpt with the adapted IWS when the  
450 maximum individual coverage is restricted to 1x. Under this restriction, only  
451 haplotypes with a population count  $\geq 10$ ,  $\geq 20$ , and  $\geq 30$  can reach the target coverages  
452 of 5x, 10x, and 15x, respectively, and therefore haplotypes with lower population  
453 counts were excluded from the analyses. Figure 6a shows the percentage of targeted  
454 haplotypes that would be sequenced at (or above) the three levels of target coverage  
455 by sequencing the set of individuals selected with AlphaSeqOpt. Figure 6b shows the  
456 number of individuals selected for sequencing in each of the scenarios.

457 With a budget of £400,000 a total of 3,333 individuals could be sequenced at  
458 1x. Under this setting, AlphaSeqOpt delivered greater percentages of haplotypes  
459 sequenced at the target coverage than the adapted IWS method. If the budget was

unrestricted, IWS selected a smaller set than AlphaSeqOpt to sequence all the targeted haplotypes at the desired coverage.

# **Effect of the number of exchanges per round during refinement:**

For the refinement of the set, there was an optimum number of exchanges per round that maximized the percentage of haplotypes sequenced at the target coverage given a fixed total number of exchanges. Figure 7a shows the percentage of haplotypes sequenced at (or above) the target coverage with a fixed number of total exchanges but with different numbers of rounds and exchanges per round, considering two extreme costs of library preparation. Figure 7b shows the size of the resultant set.

Doing 1 to 100 exchanges per round improved the percentage of haplotypes sequenced at the target coverage of the refined set to similar values. In this case, the set that produced the maximum percentage of haplotypes sequenced at the target coverage was obtained by doing 10 exchanges per round. Even though this greater percentage was generally achieved by increasing the number of unique sequenced individuals, the size of the refined set slightly decreased when the library cost was high and few exchanges per round were made. Doing more than 500 exchanges per round did not improve the results of the initial set when library cost was £40 and made the algorithm less robust when library cost was £5. However, the most extreme scenario of exchanging the whole set, which is equivalent to selecting a new initial set without any refinement in each round, provided the best improvement of the initial percentage of haplotypes sequenced at the target coverage and the greatest reduction of the sequencing set.

## Filtering of rare haplotypes based on flanking context

484           As the target haplotype coverage increases, the least frequent haplotypes can  
485 be sequenced at the target coverage only if a large amount of resources is available.  
486 More sequencing resources can be focused on sequencing common haplotypes if the  
487 number of rare haplotypes included in the analyses is reduced either by excluding  
488 them all or by filtering them based on their flanking context.

489           Figure 8 shows the distribution of the sequencing resources depending on the  
490 population count of the haplotypes with the three different approaches to deal with the  
491 rare haplotypes: to include all singletons and doubletons in the analysis, to exclude  
492 them, or to filter them based on their flanking context. Almost half of the haplotypes  
493 in the test population were observed only once (singletons; 31.7%) or twice  
494 (doubletons; 13.2%), making a total of 3,971 singletons and doubletons. Of these, 953  
495 (19%) remained after filtering based on their flanking context and these were  
496 considered as likely to have derived from a recombination event of two common  
497 haplotypes. We only show results for the scenarios in which the target haplotype  
498 coverage was 10x, with the total available sequencing resources being £400,000,  
499 £800,000, or £1,600,000.

500           With £800,000, when all singletons and doubletons were included in the  
501 analyses 72.4% of the haplotypes with population count  $\geq 3$  were sequenced at (or  
502 above) 10x. This percentage increased to 75.3% when all singletons and doubletons  
503 were excluded. This percentage also increased, but a little bit less, when they were  
504 filtered based on their flanking context (74.8%). A similar trend was observed with  
505 £400,000 and £1,600,000.

506           When we have a large amount of sequencing resources we may be interested  
507 in targeting rare haplotypes as well as common haplotypes. By filtering based on their

508 flanking context we can target the rare haplotypes that are likely to derive from a  
509 recombination of common haplotypes. With £1,600,000, a total of 38.6% of the 953  
510 target singletons and doubletons were sequenced at 10x. Only 33.0% of these 953 was  
511 sequenced at 10x when all singletons and doubletons were included in the analyses  
512 without any restriction. This benefit of filtering by flanking context was not observed  
513 when less sequencing resources were available, probably because in such scenarios  
514 sequencing resources were implicitly focused on the common haplotypes.

515

## Discussion

516 We have presented a method that identifies which individuals need to be  
517 sequenced and at what coverage they should be sequenced when a given amount of  
518 sequencing resources are available so that the maximum percentage of the haplotypes  
519 present in the population are sequenced at (or above) a coverage that is sufficiently  
520 high to ensure that the consensus haplotypes can be accurately derived. Deriving the  
521 consensus haplotypes accurately is a critical requirement for achieving high  
522 population-based imputation accuracy under the LCSeq strategy and we have  
523 observed with a prototype of a novel population-based phasing and imputation  
524 method that there is a relationship between the coverage that a particular haplotype  
525 accumulates across individuals and the imputation accuracy of the consensus  
526 haplotype (Additional file 1: Figure S1). We also developed and tested a new  
527 approach to deal with rare haplotypes by filtering them based on their flanking  
528 context rather than excluding them from the analysis. We compared AlphaSeqOpt  
529 with previously published methods and hereafter discuss the advantages and  
530 limitations of AlphaSeqOpt.

531

## Advantages of AlphaSeqOpt over other methods

AlphaSeqOpt has two features that make it effective for its purpose: (1) a score function based on the frequency of the haplotypes in the sequencing set relative to the target coverage instead of on the population frequency of the haplotypes; and (2) a step of refinement of the initial set.

### Score function:

The score function that we propose allocates sequencing resources such that the percentage of haplotypes sequenced at any target coverage is greater than with other score functions based on the population frequency of the haplotype. The score function based on the population frequency of the haplotype used in the IWS method [17] was designed for producing the least redundant set that should be sequenced to have all the targeted haplotypes sequenced. The reduction of redundancy with the IWS method is achieved by giving a greater score to the least frequent haplotypes and, therefore, selecting the individuals that carry less frequent haplotypes first. Therefore, if the sequencing resources are sufficient for sequencing all the targeted haplotypes, the IWS method does so by sequencing a smaller set than AlphaSeqOpt. However, the IWS method is not ideal for identifying the set of individuals that would provide a more even sequencing coverage of the largest percentage of population haplotypes when the sequencing resources are limited and insufficient for sequencing all the targeted haplotypes at the desired coverage. With a score function that uses the population frequency the haplotype scores are constant until these haplotypes reach the target coverage, at which point they are set to zero. A score function based on the frequency of the haplotypes in the sequencing set relative to the target coverage like the one used in AlphaSeqOpt performs better for this purpose because, in contrast, the



haplotype scores change as the sequencing resources are allocated. With the AlphaSeqOpt score function all haplotypes start with an equal score of 1 and their score increases exponentially as they approach the target coverage.

By doing this, the AlphaSeqOpt score function prioritizes the haplotypes that are already closer to the target coverage and, implicitly, the individuals that carry a larger number of these haplotypes. This reduces the percentage of haplotypes that are sequenced at a suboptimal coverage, but it increases the percentage of haplotypes that receive no coverage at all. With limited sequencing resources, AlphaSeqOpt selects a set for sequencing with a larger percentage of population haplotypes at the target coverage than the IWS method. These sequencing sets can be even smaller than the ones produced with IWS score function if the initial set is not refined.

# **Refinement of the initial set:**

The other main feature of AlphaSeqOpt is the step of refinement of the initial set. The step of refinement adjusts the allocation of resources by replacing individuals that have become redundant after the last additions to the set or by reducing the sequencing coverage of these individuals. A refinement step as described here further increases the percentage of haplotypes sequenced at the target coverage obtained with the AlphaSeqOpt score function. A side benefit in the context of LCSeq is that the refinement step achieves this increase by diversifying the set of individuals that are sequenced. While the IWS score function restrains the number of sequenced individuals, the AlphaSeqOpt score function benefits from low library costs relative to the total amount of sequencing resources available to produce larger sets with more unique individuals that are sequenced at lower coverage. This benefit is greater when the cost of library preparation represents a small fraction of the total amount of

581 sequencing resources for LCSeq. Methods for reducing significantly the costs of  
582 library preparation for high-throughput LCSeq have already been described [27].  
583 Increasing the number of individuals sequenced would empower subsequent  
584 imputation for more individuals (i.e., these individuals and their relatives) as well as  
585 any downstream analyses [12].

586 The refinement step can be fine-tuned by adjusting parameters such as the  
587 number of exchange rounds and the number of exchanges per round. The optimal  
588 parameters may depend largely on the size and structure of each dataset, but the  
589 following general observations were made:

590 - AlphaSeqOpt was very robust across repetitions. A stable solution was  
591 produced after a relatively low number of exchange rounds (unpublished results).  
592 Small further increases of the percentage of haplotypes sequenced at the target  
593 coverage could be obtained by using a longer chain of exchange rounds, but the  
594 benefit of this was little.

595 - To some extent, increasing the number of exchanges per round enables  
596 greater mobility across possible sets. Consequently, the algorithm can retrieve a better  
597 solution more easily. However, when too many exchanges are made per round, the  
598 benefit of this refinement of the existing set is diluted due to the drift towards  
599 solutions that are too divergent from each other and thus the final solution becomes  
600 less reliable. Exchanging all the individuals in the set is an extreme case of this that is  
601 equivalent to choosing the best of multiple initial sets without refinement. It can  
602 produce good results in terms of percentage of haplotypes for small sequencing sets.

603

604 **Practical implications for real populations:**

605            Provided that the cost of library preparation is low enough or by restricting the  
606            maximum coverage of the individuals, AlphaSeqOpt will produce large sets of  
607            individuals with many unique individuals that are sequenced at low coverage.

608            The performance of AlphaSeqOpt will likely be influenced by structure of the  
609            data, either intrinsic, like the number and size of the chromosomes in a species or the  
610            degree of relatedness between individuals, or extrinsic, like the core length used to  
611            define the haplotypes. AlphaSeqOpt assumes that coverage is uniform along the  
612            genome but variation in coverage at the level of nucleobase should be expected, as  
613            well as variation of coverage between samples.

614            Although the criterion that is maximised in AlphaSeqOpt is the percentage of  
615            unique haplotypes sequenced at (or above) the target coverage, the method also  
616            provides good coverage in terms of total population haplotypes, i.e., haplotypes  
617            weighted by their population frequencies. Implicitly, the scores of more frequent  
618            haplotypes will increase faster than the scores of less frequent haplotypes because  
619            they are more likely to be carried by the individuals that are added to the sequencing  
620            set. In all scenarios tested, both AlphaSeqOpt and the adapted IWS method provided  
621            total percentages of haplotypes >99%, but the percentage was consistently greater for  
622            AlphaSeqOpt. Although both methods were similarly successful in covering the  
623            haplotypes of most of the population, AlphaSeqOpt captured a greater diversity of  
624            haplotypes at the desired coverage.

625            The resolution of the haplotype library will depend on the density of the  
626            marker array used to construct it. However after sequencing the individuals it is  
627            possible that haplotypes that were considered to form a single consensus haplotype  
628            when defined with marker data actually correspond to a number of true haplotypes. In

such cases the sequence data can be clustered into the multiple consensus haplotypes and the pedigree information could enhance their imputation.

### **Utility of filtering rare haplotypes based on flanking context**

We proposed an approach that uses the haplotype population frequencies at the cores flanking a particular core to identify those rare haplotypes that could have derived from a recombination event. Although rare haplotypes may contain relevant biological information, we may not be able to impute and estimate accurately the effect of most rare haplotypes. The rationale behind the filtering approach that we propose is that sequence data of those rare haplotypes that are potentially mosaic of common haplotypes could enable a more precise capture of the recombination events that have occurred in the population and that this sequence data would also contribute to the consensus haplotypes of the haplotypes that gave rise to the mosaic. The new approach that we propose, although not ideal, may be of a particular interest in cases in which large amounts of sequencing resources are available.

In real populations we expect to identify large numbers of rare haplotypes. Preliminary tests indicated that in real populations our filtering approach based on flanking context can filter out around 92% of the singletons and doubletons observed, with the other 8% retained as potentially mosaic (unpublished results).

The challenge of targeting rare mosaic haplotypes is that the individuals that carry them must be sequenced at a greater coverage so that the rare haplotypes reach the target coverage. Another approach, for which we do not show results here, involves setting a lower secondary target coverage for less frequent haplotypes. This is a compromise solution where reducing the sequencing coverage of the rare haplotypes will reduce their imputation accuracy but will allow more rare haplotypes

653 to be sequenced. In the particular case of potentially mosaic rare haplotypes having  
 654 less coverage would be less critical because the information of the common  
 655 haplotypes from which they derive will be also available. Any of the approaches  
 656 discussed to filter low-frequency haplotypes can be combined using multiple  
 657 frequency thresholds.  
 658

# **Suitability of AlphaSeqOpt for low-coverage sequencing designs**

659 A number of optimisation methods that use haplotypes derived from existing  
 660 phased marker array genotypes have already been proposed to identify which  
 661 individuals should be sequenced under the KeySires approach. Druet et al. [5]  
 662 proposed a method that maximizes the proportion of haplotypes observed in the  
 663 population that are sequenced. This method was more effective in detecting rare  
 664 variants (minor allele frequency <5%) than methods based solely on pedigree  
 665 information and it provided good imputation accuracies for both common and rare  
 666 variants. Bickhart et al. [17] proposed the IWS method, which reduces the number of  
 667 individuals that need to be sequenced in order to have all haplotypes above a certain  
 668 population frequency sequenced. The method by Gusev et al. [16] selects the  
 669 individuals that share the largest proportion of the population haplotypes with other  
 670 individuals identical-by-descent (IBD). More recently, Neuditschko et al. [18]  
 671 proposed a method based on the eigenvalue decomposition of a genomic relationship  
 672 matrix that identifies individuals that maximise genetic diversity within complex  
 673 population structures. These four methods identify which individuals should be  
 674 sequenced but do not make any decision on the coverage at which they should be  
 675 sequenced. Gonen et al. [14] proposed an approach that distributes sequence at  
 676 variable coverage across individuals in a population. This method accounts for

677 haplotype frequency and the ability to phase the resulting sequence data as criteria  
 678 when choosing individuals to sequence and assigning sequencing coverage to those  
 679 individuals and their recent ancestors. We have presented a method for optimizing the  
 680 allocation of sequencing resources for the LCSeq approach so that the imputation  
 681 accuracy of consensus haplotypes is high enough for enabling novel population-based  
 682 imputation methods.

683         In practice, it is likely that a combination of the three sequencing approaches  
 684 discussed in this paper (KeySires, LCSeq, and VarCoverage) would yield similar or  
 685 even better imputation accuracies than LCSeq alone [28]. AlphaSeqOpt is flexible in  
 686 that it can take into account the already available sequence information. Therefore,  
 687 AlphaSeqOpt for optimizing LCSeq can be used either alone or complementarily to  
 688 other existing methods to top-up the coverage of those haplotypes that are under-  
 689 sequenced after using any other method. In this later case, however, existing methods  
 690 or newly developed ones should be integrated to find the right allocation of resources  
 691 into each of the three sequencing approaches.

692

# Conclusion

693         We have presented a method for optimizing the allocation of sequencing  
 694 resources so that the maximum proportion of population haplotypes are sequenced at  
 695 a coverage that is sufficiently high for population-based imputation with low-  
 696 coverage sequencing. The haplotype score function and the refinement step make  
 697 AlphaSeqOpt more effective for this purpose than methods reported previously for  
 698 reducing sequencing redundancy. AlphaSeqOpt can account for sequence information  
 699 already available for the population, which makes it a good complementary method to  
 700 increase coverage of haplotypes that are not sufficiently covered when other

701 optimisation methods are used. We also explored a new approach to deal with rare  
702 haplotypes by targeting only those that are likely derived by recombination of  
703 common haplotypes. This approach frees resources to sequence greater proportion of  
704 distinct haplotypes, which can be useful particularly when large amounts of  
705 sequencing resources are available.

706

707

## Competing interests

708 The authors declare that they have no competing interests.

709

## Authors' contributions

710 JMH and RRF designed the algorithm and the study; RRF performed the analyses;  
711 RRF wrote the first draft; GG and SG assisted in the interpretation of the results and  
712 provided comments on the manuscript. All authors read and approved the final  
713 manuscript.

714

## Acknowledgements

715 The authors acknowledge the financial support from the BBSRC ISPG to The Roslin  
716 Institute BB/J004235/1, from Genus PLC and from grant numbers BB/M009254/1,  
717 BB/L020726/1, BB/N004736/1, BB/N004728/1, BB/L020467/1, BB/N006178/1 and  
718 Medical Research Council (MRC) grant number MR/M000370/1. This work has  
719 made use of the resources provided by the Edinburgh Compute and Data Facility  
720 (ECDF) (<http://www.ecdf.ed.ac.uk>). The authors thank Dr Andrew Derrington  
721 (Scotland, UK) for assistance in refining the manuscript.

722

## References

- 723 1. Pasaniuc B, Rohland N, McLaren PJ, Garimella K, Zaitlen N, Li H, et al.  
724 Extremely low-coverage sequencing and imputation increases power for genome-  
725 wide association studies. *Nat. Genet.* 2012;44:631–5.
- 726 2. Daetwyler HD, Capitan A, Pausch H, Stothard P, van Binsbergen R, Brondum RF,  
727 et al. Whole-genome sequencing of 234 bulls facilitates mapping of monogenic and  
728 complex traits in cattle. *Nat Genet.* 2014;46:858–65.
- 729 3. Nicod J, Davies RW, Cai N, Hassett C, Goodstadt L, Cosgrove C, et al. Genome-  
730 wide association of multiple complex traits in outbred mice by ultra-low-coverage  
731 sequencing. *Nat. Genet.* 2016;48:912–8.
- 732 4. Meuwissen T, Goddard M. Accurate Prediction of Genetic Values for Complex  
733 Traits by Whole-Genome Resequencing. *Genetics.* 2010;185:623–31.
- 734 5. Druet T, Macleod IM, Hayes BJ. Toward genomic prediction from whole-genome  
735 sequence data: impact of sequencing design on genotype imputation and accuracy of  
736 predictions. *Heredity.* 2014;112:39–47.
- 737 6. Hickey JM. Sequencing millions of animals for genomic selection 2.0. *J. Anim.*  
738 *Breed. Genet.* 2013;130:331–2.
- 739 7. Hickey J, Kinghorn BP, Cleveland MA, Tier B, van der Werf JHJ. Recursive long  
740 range phasing and long haplotype library imputation: Building a global haplotype  
741 library for Holstein cattle. *Proc. 9th World Congr. Genet. Appl. Livest. Prod.*  
742 *WCGALP.* Leipzig, Germany; 2010. p. 0934.
- 743 8. Brøndum R, Guldbrandtsen B, Sahana G, Lund M, Su G. Strategies for imputation  
744 to whole genome sequence using a single or multi-breed reference population in  
745 cattle. *BMC Genomics.* 2014;15:728.
- 746 9. van Binsbergen R, Bink MC, Calus MP, van Eeuwijk FA, Hayes BJ, Hulsege I, et  
747 al. Accuracy of imputation to whole-genome sequence data in Holstein Friesian cattle.  
748 *Genet. Sel. Evol.* 2014;46:41.
- 749 10. VanRaden PM, Sun C, O’Connell JR. Fast imputation using medium or low-  
750 coverage sequence data. *BMC Genet.* 2015;16:82.
- 751 11. Davies RW, Flint J, Myers S, Mott R. Rapid genotype imputation from sequence  
752 without reference panels. *Nat. Genet.* 2016;48:965–9.
- 753 12. Li Y, Sidore C, Kang HM, Boehnke M, Abecasis GR. Low-coverage sequencing:  
754 Implications for design of complex trait association studies. *Genome Res.*  
755 2011;21:940–51.
- 756 13. Hickey JM, Gorjanc G, Cleveland MA, Kranis A, Jenko J, Mészáros G, et al.  
757 Sequencing Millions of Animals for Genomic Selection 2.0. *Proc. 10th World Congr.*  
758 *Genet. Appl. Livest. Prod. WCGALP.* Vancouver, BC, Canada; 2014. p. 377.



14. Gonen S, Ros-Freixedes R, Battagin M, Gorjanc G, Hickey JM. A method for allocation of sequencing resources in genotyped livestock populations. *Genet. Sel. Evol.* Submitted;
15. Le SQ, Durbin R. SNP detection and genotyping from low-coverage sequencing data on multiple diploid samples. *Genome Res.* 2011;21:952–60.
16. Gusev A, Shah MJ, Kenny EE, Ramachandran A, Lowe JK, Salit J, et al. Low-Pass Genome-Wide Sequencing and Variant Inference Using Identity-by-Descent in an Isolated Human Population. *Genetics.* 2012;190:679–89.
17. Bickhart DM, Hutchison JL, Null DJ, VanRaden PM, Cole JB. Reducing animal sequencing redundancy by preferentially selecting animals with low-frequency haplotypes. *J. Dairy Sci.* 2016;99:5526–34.
18. Neuditschko M, Raadsma HW, Khatkar MS, Jonas E, Steinig EJ, Flury C, et al. Identification of key contributors in complex population structures. Chaubey G, editor. *PLOS ONE.* 2017;12:e0177638.
19. Sampson J, Jacobs K, Yeager M, Chanock S, Chatterjee N. Efficient study design for next generation sequencing. *Genet. Epidemiol.* 2011;35:269–77.
20. Chen GK, Marjoram P, Wall JD. Fast and flexible simulation of DNA sequence data. *Genome Res.* 2009;19:136–42.
21. Hickey JM, Gorjanc G. Simulated data for genomic selection and genome-wide association studies using a combination of coalescent and gene drop methods. *G3.* 2012;2:425–7.
22. Faux A-M, Gorjanc G, Gaynor RC, Battagin M, Edwards SM, Wilson DL, et al. AlphaSim: Software for Breeding Program Simulation. *Plant Genome.* 2016;9.
23. Villa-Angulo R, Matukumalli LK, Gill CA, Choi J, Tassell CPV, Grefenstette JJ. High-resolution haplotype block structure in the cattle genome. *BMC Genet.* 2009;10:19.
24. Hickey JM, Kinghorn BP, Tier B, Wilson JF, Dunstan N, Werf JH van der. A combined long-range phasing and long haplotype imputation method to impute phase for SNP genotypes. *Genet. Sel. Evol.* 2011;43:12.
25. Hickey JM, Kranis A. Extending long-range phasing and haplotype library imputation methods to impute genotypes on sex chromosomes. *Genet. Sel. Evol.* 2013;45:10.
26. Hickey JM, Gorjanc G, Varshney RK, Nettelblad C. Imputation of Single Nucleotide Polymorphism Genotypes in Biparental, Backcross, and Topcross Populations with a Hidden Markov Model. *Crop Sci.* 2015;55:1934–46.
27. Rohland N, Reich D. Cost-effective, high-throughput DNA sequencing libraries for multiplexed target capture. *Genome Res.* 2012;22:939–46.

796 28. Xu C, Wu K, Zhang J-G, Shen H, Deng H-W. Low-, high-coverage, and two-  
797 stage DNA sequencing in the design of the genetic association study. Genet.  
798 Epidemiol. 2017;41:187–97.

799

## Figures

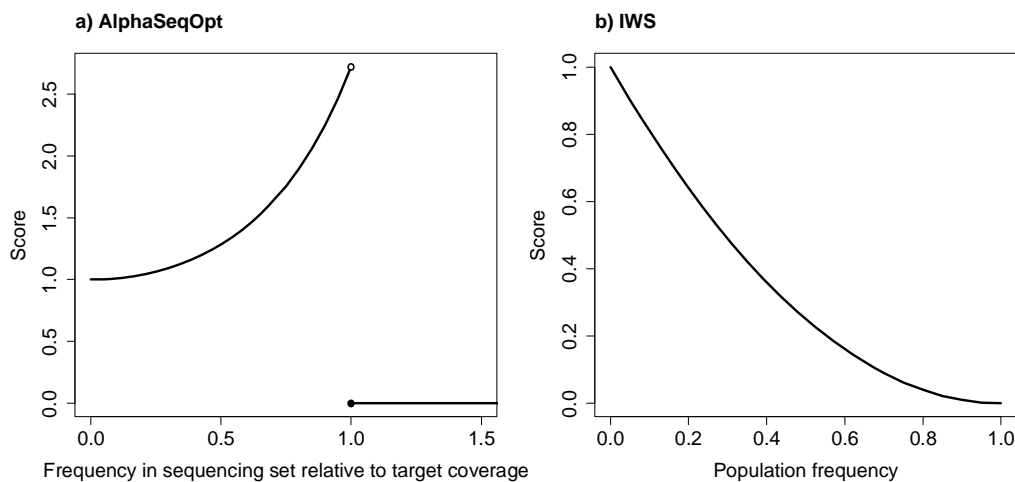

**Figure 1.** Score functions: (a) in AlphaSeqOpt; and (b) in the IWS method proposed by Bickhart et al. [17]. Note the different axes: in (a) scores range from 1 to  $e^k$  based on the frequency of the haplotype in the sequencing set relative to the target coverage, which is variable across rounds; in (b), scores range from 0 to 1 based on the population frequency, which is fixed.

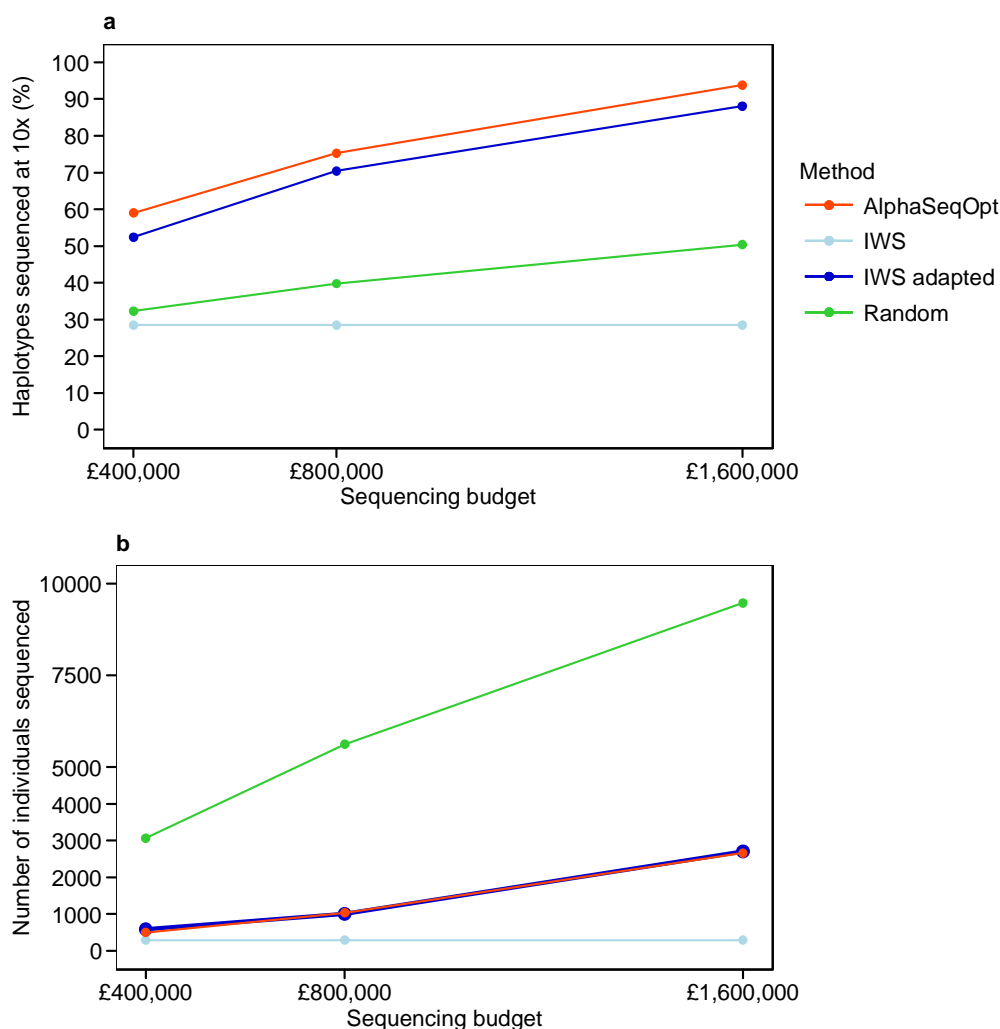

**Figure 2.** Performance of the four methods tested with different amounts of sequencing resources, in terms of: (a) the percentage of population haplotypes sequenced at (or above) the target coverage of 10x; and (b) the number of individuals sequenced. Standard errors were less than 0.2% (a) and 25 (b).

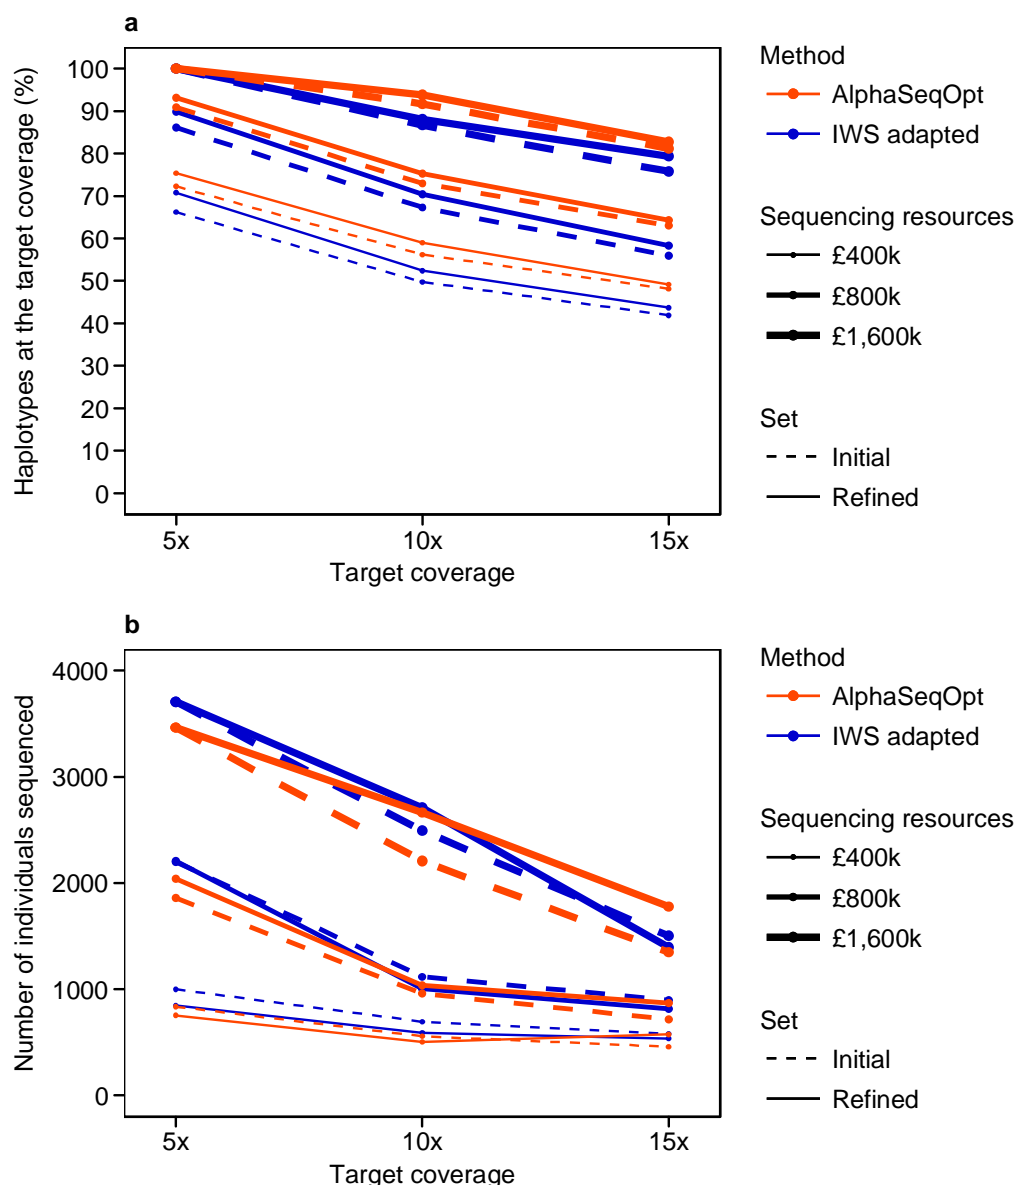

**Figure 3.** Performance of AlphaSeqOpt and the adapted IWS method with three levels of target haplotype coverage and different amounts of sequencing resources, in terms of: (a) the percentage of population haplotypes sequenced at (or above) the target coverage of 10x; and (b) the number of individuals sequenced. Both the initial and refined sets were examined. Standard errors were less than 0.4% (a) and 40 (b).

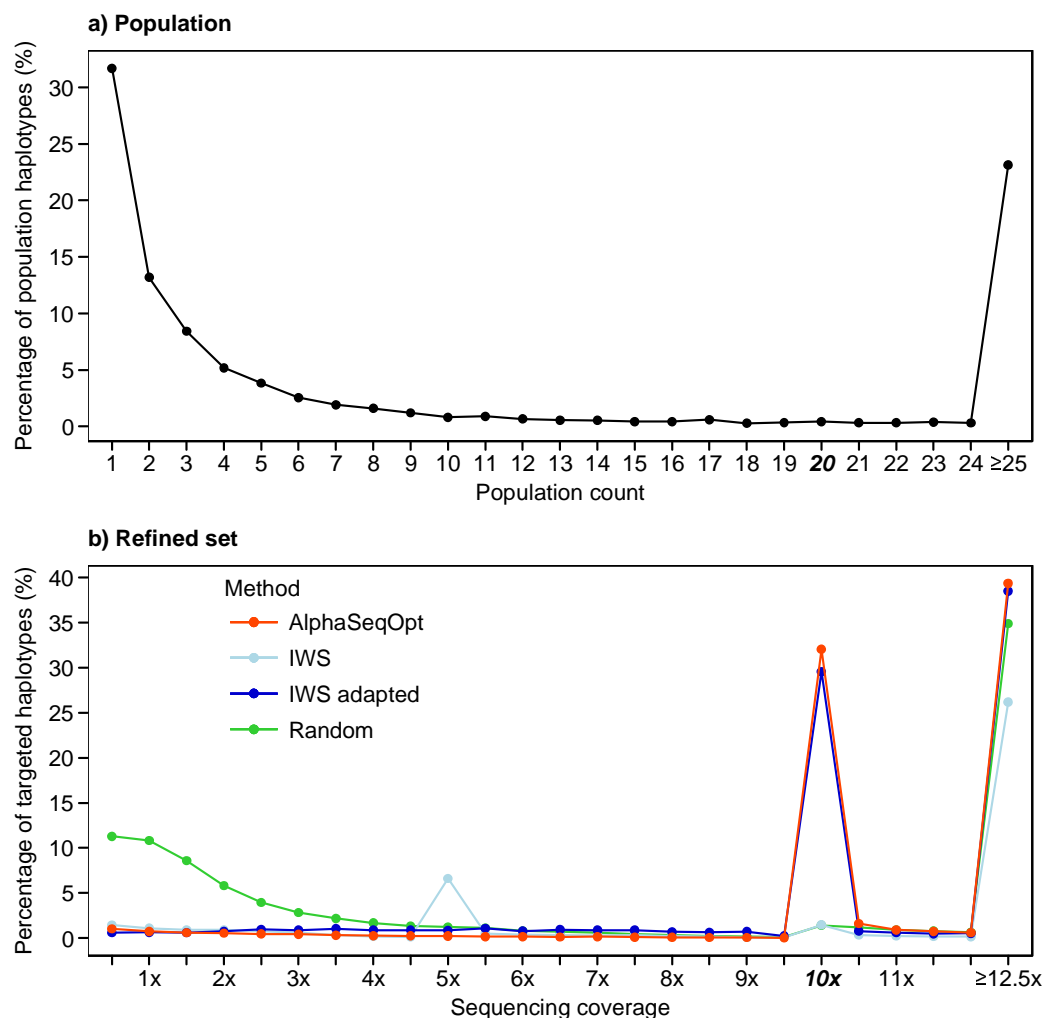

**Figure 4.** Distribution of: (a) the population count of the haplotypes; and (b) the sequencing coverage of the haplotypes using the four methods tested. The target haplotype coverage was 10x, the sequencing resources were set to £800,000 and haplotypes with population count  $\leq 2$  were excluded from the analyses. Standard errors were less than 14 (b).

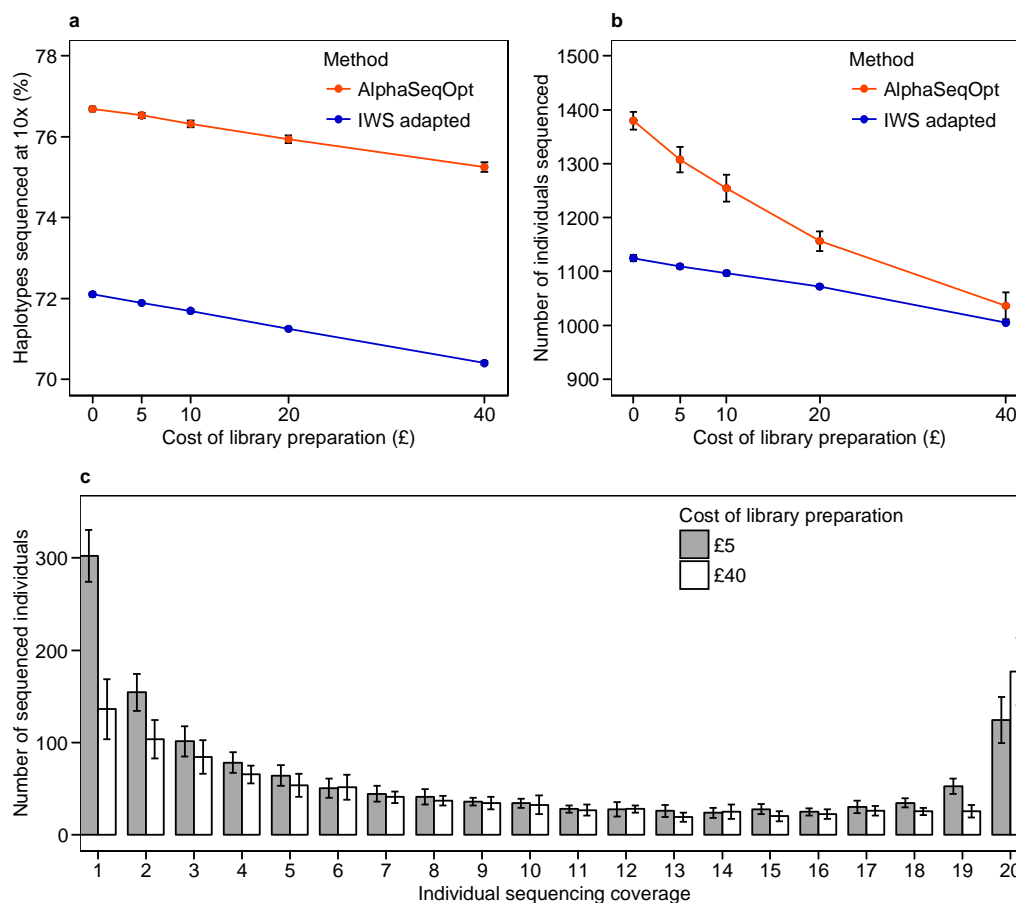

**Figure 5.** Effect of the cost of library preparation: (a) on the percentage of haplotypes sequenced at (or above) the target coverage of 10x; (b) on the number of individuals sequenced, using AlphaSeqOpt or the adapted IWS method; and (c) on the distribution of sequencing coverage of the individuals selected with AlphaSeqOpt. The sequencing resources were set to £800,000 and haplotypes with population count  $\leq 2$  were excluded from the analyses.

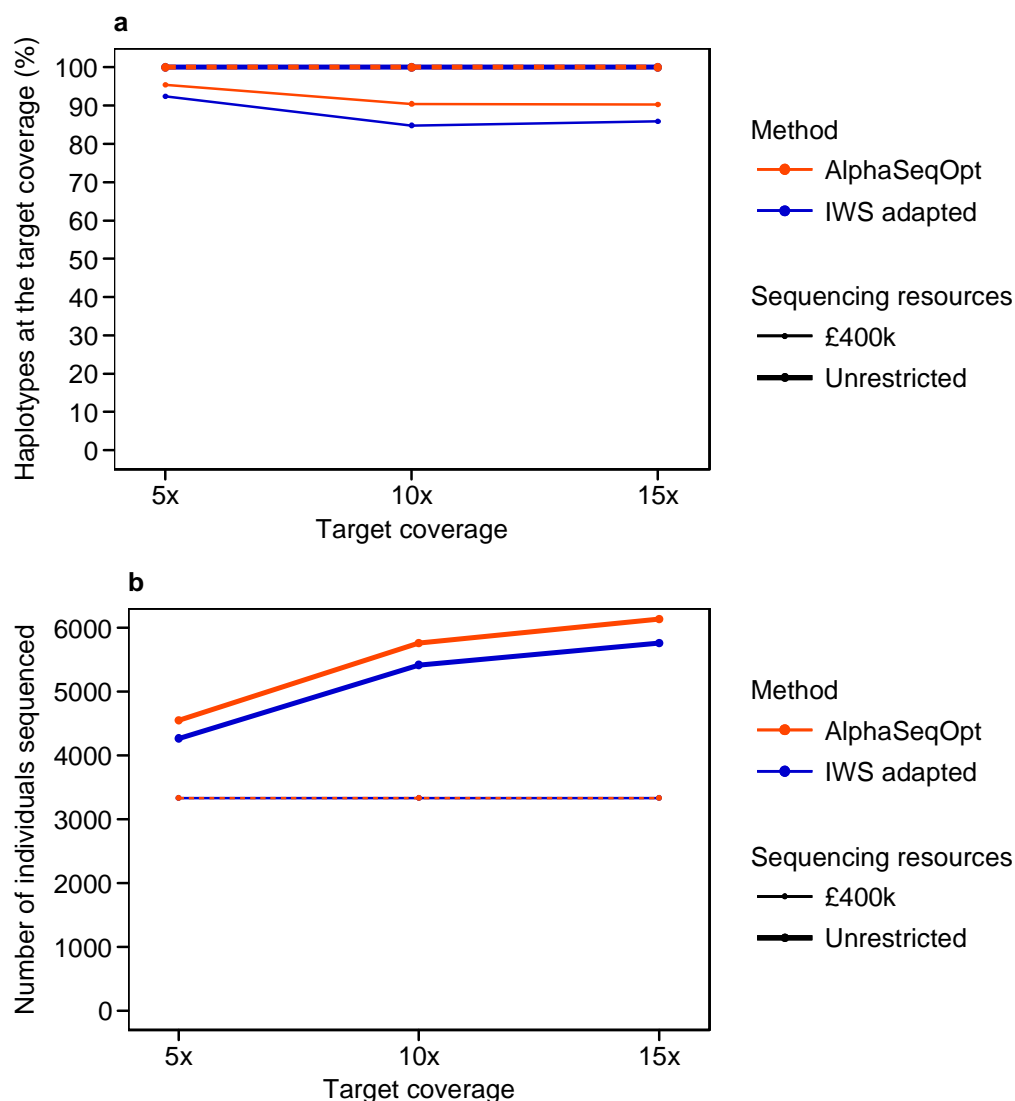

**Figure 6.** Performance of AlphaSeqOpt and the adapted IWS method when individual coverage is restricted to 1x, in terms of: (a) the percentage of population haplotypes sequenced at (or above) the target coverage; and (b) the number of individuals sequenced. When the target coverage was 5x, 10x, or 15x only haplotypes with population count  $\geq 10$ ,  $\geq 20$ , or  $\geq 30$  were targeted, respectively.



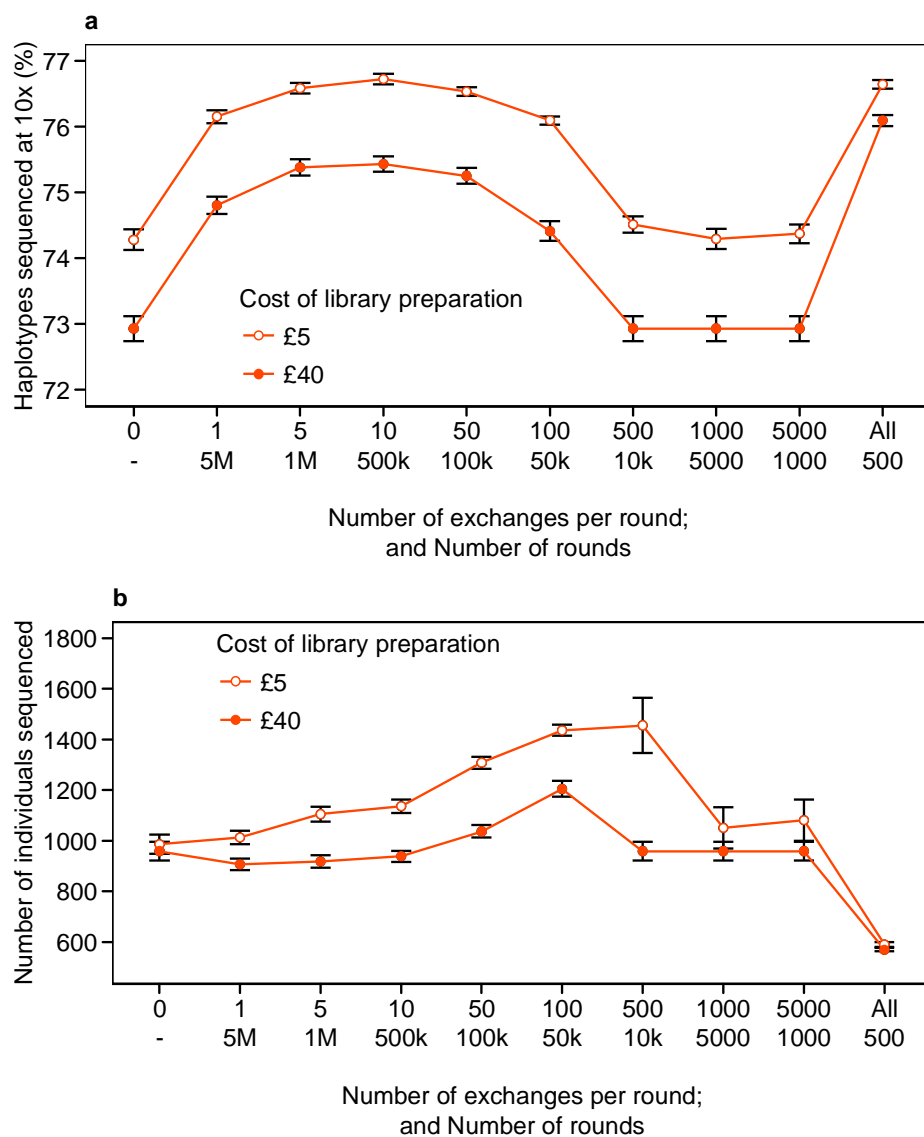

**Figure 7.** Effect of the number of exchanges per round: (a) on the percentage of haplotypes sequenced at (or above) the target coverage of 10x; and (b) on the number of individuals sequenced, with two costs of library preparation. The total number of exchanges is 5 millions in all cases. The sequencing resources were set to £800,000 and haplotypes with population count  $\leq 2$  were excluded from the analyses.

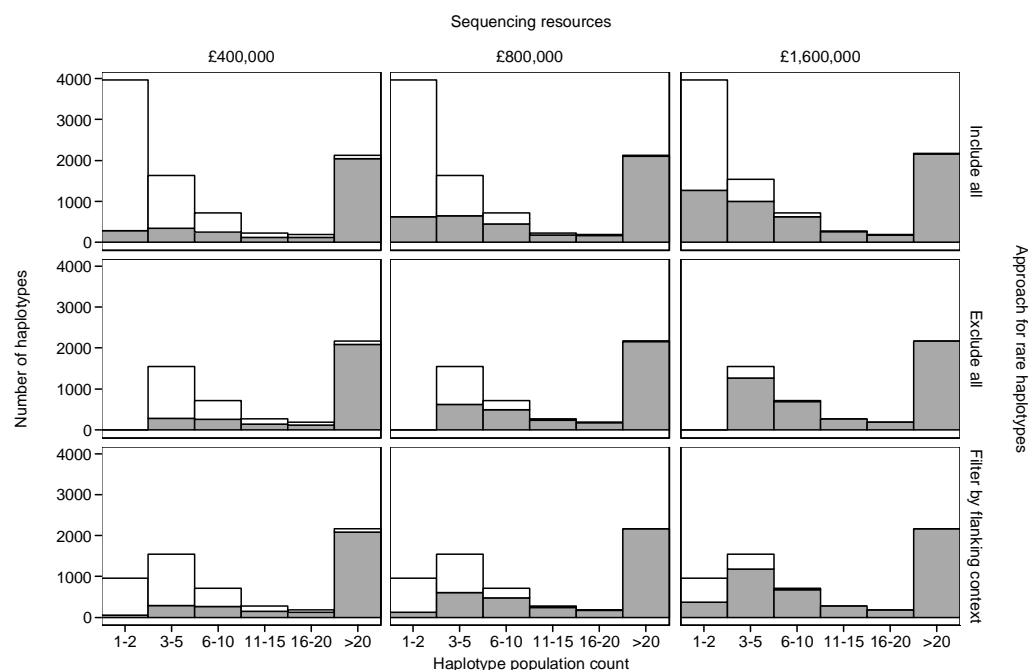

**Figure 8.** Number of haplotypes sequenced at (or above) the target coverage of 10x (filled section) using three different approaches to handle the rare haplotypes: to include all singletons and doubletons, to exclude all singletons and doubletons, or to filter them based on flanking context. Numbers are shown by haplotype population count and for different amounts of sequencing resources. The number of singletons and doubletons for each approach were 3,971, 0, and 953, respectively.

# Additional files

## Additional file 1: Figure S1

854 Format: pdf

855 Title: Expected haplotype imputation accuracy against the accumulated haplotype  
856 sequencing coverage, as estimated using a novel population-based imputation method  
857 (Battagin and Hickey, unpublished).

858 Description: A description of the prototype algorithm developed for the imputation of  
859 consensus haplotypes under the LCSeq approach and the simulated results on which  
860 the AlphaSeqOpt method is based. We generated 1x sequence data for the sires from a  
861 simulated population. The x-axis represents the expected accumulated coverage that  
862 each haplotype would receive. The y-axis represents the percentage of alleles phased  
863 and imputed for each haplotype. The imputation accuracy increased with the  
864 accumulated haplotype coverage until it plateaued. Haplotypes with a sequencing  
865 coverage of 10x accumulated from 20 individuals sequenced at 1x were imputed to  
866 the whole population with an accuracy of 0.88. Haplotypes with a sequencing  
867 coverage of 15x or 20x accumulated from 30 or 40 individuals sequenced at 1x were  
868 imputed to the whole population with an accuracy of 0.93 or 0.97, respectively. For  
869 accurate inference of a consensus haplotype a certain amount of sequencing coverage  
870 must be accumulated. According to the results above, 10x or 15x could be good target  
871 coverages for the haplotypes.
